# Supplementary material for: 300 years of hydrological records and societal responses to droughts and floods on the Pacific coast of Central America
Source: Copernicus journal article supplement (doi:10.5194/cp-14-175-2018), 2018-02-15
Supplement: Supplementary file 1 [file cp-14-175-2018-supplement.pdf]

Supplement of *Clim. Past*, 14, 175–191, 2018  
<https://doi.org/10.5194/cp-14-175-2018-supplement>  
© Author(s) 2018. This work is distributed under  
the Creative Commons Attribution 3.0 License.

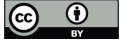

*Supplement of*

## **300 years of hydrological records and societal responses to droughts and floods on the Pacific coast of Central America**

**Alvaro Guevara-Murua et al.**

*Correspondence to:* Alvaro Guevara-Murua ([alvaro.guevara.2012@my.bristol.ac.uk](mailto:alvaro.guevara.2012@my.bristol.ac.uk))

The copyright of individual parts of the supplement might differ from the CC BY 3.0 License.

## Supplementary Information

**Table SI.1** Hydrological index and confidence rating [<https://www.ncdc.noaa.gov/paleo/study/22772>]. for each year reconstructed in this study

| Year | Confidence Rating | Hydrological Index |
|------|-------------------|--------------------|
| 1645 | 3                 | Very Dry           |
| 1650 | 3                 | Very Dry           |
| 1652 | 1                 | Wet                |
| 1655 | 3                 | Very Dry           |
| 1660 | 3                 | Very Dry           |
| 1661 | 3                 | Dry                |
| 1666 | 3                 | Dry                |
| 1669 | 3                 | Dry                |
| 1678 | 3                 | Dry                |
| 1682 | 3                 | Dry                |
| 1685 | 1                 | Very Wet           |
| 1686 | 3                 | Very Dry           |
| 1688 | 3                 | Very Wet           |
| 1690 | 3                 | Dry                |
| 1691 | 3                 | Very Dry           |
| 1693 | 1                 | Wet                |
| 1694 | 1                 | Dry                |
| 1696 | 3                 | Very Dry           |
| 1697 | 1                 | Very Wet           |
| 1699 | 3                 | Very Dry           |
| 1701 | 3                 | Dry                |
| 1709 | 3                 | Dry                |
| 1710 | 3                 | Dry                |
| 1714 | 3                 | Dry                |
| 1718 | 3                 | Very Dry           |
| 1720 | 3                 | Very Dry           |
| 1721 | 3                 | Very Dry           |

|      |   |          |
|------|---|----------|
| 1722 | 3 | Dry      |
| 1723 | 3 | Dry      |
| 1726 | 3 | Dry      |
| 1727 | 1 | Wet      |
| 1732 | 1 | Dry      |
| 1733 | 3 | Dry      |
| 1734 | 3 | Very Dry |
| 1736 | 3 | Very Dry |
| 1739 | 3 | Very Dry |
| 1746 | 3 | Very Dry |
| 1747 | 1 | Dry      |
| 1748 | 3 | Very Dry |
| 1749 | 2 | Very Wet |
| 1752 | 3 | Dry      |
| 1756 | 1 | Wet      |
| 1762 | 1 | Very Wet |
| 1765 | 2 | Wet      |
| 1773 | 1 | Wet      |
| 1780 | 3 | Wet      |
| 1783 | 1 | Very Wet |
| 1784 | 1 | Wet      |
| 1792 | 2 | Very Wet |
| 1794 | 2 | Wet      |
| 1796 | 3 | Very Dry |
| 1803 | 2 | Dry      |
| 1807 | 2 | Wet      |
| 1810 | 2 | Dry      |
| 1813 | 2 | Wet      |
| 1816 | 1 | Very Wet |
| 1817 | 1 | Wet      |
| 1819 | 1 | Wet      |

|      |                                  |          |
|------|----------------------------------|----------|
| 1821 | 3                                | Very Dry |
| 1822 | 3                                | Very Dry |
| 1824 | 1                                | Dry      |
| 1827 | 1                                | Wet      |
| 1829 | 1                                | Dry      |
| 1840 | 1                                | Very Dry |
| 1843 | 1 (Based on Claxton, 1986, 1998) | Dry      |
| 1844 | 1 (Based on Claxton, 1986, 1998) | Dry      |
| 1846 | 1                                | Very Wet |
| 1852 | 1                                | Wet      |
| 1860 | 1 (Based on Claxton, 1986, 1998) | Dry      |
| 1865 | 1                                | Wet      |
| 1867 | 1                                | Wet      |
| 1868 | 1 (Based on Claxton, 1986, 1998) | Dry      |
| 1874 | 3                                | Wet      |
| 1878 | 2                                | Very Wet |
| 1885 | 1 (Based on Claxton, 1986, 1998) | Dry      |
| 1888 | 1 (Based on Claxton, 1986, 1998) | Dry      |
| 1891 | 1 (Based on Claxton, 1986, 1998) | Dry      |
| 1895 | 1 (Based on Claxton, 1986, 1998) | Dry      |
| 1896 | 1                                | Wet      |
| 1897 | 3                                | Very Wet |
| 1899 | 1 (Based on Claxton, 1986, 1998) | Dry      |
| 1903 | 1                                | Wet      |
| 1909 | 1                                | Wet      |
| 1911 | 1                                | Wet      |
| 1912 | 1 (Based on Claxton, 1986, 1998) | Dry      |
| 1914 | 1                                | Very Dry |
| 1920 | 1 (Based on Claxton, 1986, 1998) | Dry      |
| 1921 | 3                                | Wet      |
| 1922 | 1 (Based on Claxton, 1986, 1998) | Dry      |

|      |   |          |
|------|---|----------|
| 1923 | 1 | Wet      |
| 1933 | 1 | Very Wet |
| 1944 | 1 | Wet      |
